# Supplementary material for: Clinicopathological features of pathogenic, non-pathogenic, and unknown significance (NP/US) POLE mutations in endometrial carcinomas: A study based on actual world
Source: Research Square preprint supplement (doi:10.21203/rs.3.rs-6689956/v1), 2025-07-02
Supplement: Supplementary file 1 [file e1af6f9568abac2859ed43cc.docx]

Supplementary Table. NP/US *POLE* mutations in ECs

| **Protein change** | **Nucleotide substitution** | **Exon** | **Total number of cases** |
| --- | --- | --- | --- |
| p.D268E | c.804C>G | 9 | 1 |
| p.P269L | c.806C>T | 9 | 1 |
| p.A273V | c.818C>T | 9 | 1 |
| p.E277D | c.831G>T | 9 | 1 |
| p.T278K | c.833C>A | 9 | 1 |
| p.L283P | c.848T>C | 9 | 1 |
| p.E289G | c.866A>G | 9 | 1 |
| p.S297Y | c.890C>A | 9 | 2 |
| p.M299A | c.896T>G | 9 | 1 |
| p.L343P | c.1028T>C | 11 | 1 |
| p.I344M | c.1032C>G | 11 | 1 |
| p.N363K | c.1089C>G | 11 | 1 |
| p.N363= | c.1089C＞T | 11 | 1 |
| p.F366= | c.1098T>C | 11 | 1 |
| p.F367C | c.1100T>G | 11 | 1 |
| p.D368G | c.1103A>G | 11 | 1 |
| p.V411A | c.1232T>C | 13 | 1 |
| p.R443W | c.1237A＞G | 13 | 1 |
| p.D414N | c.1240G>A | 13 | 1 |
| p.H422Y | c.1264C>T | 13 | 1 |
| p.A426V | c.1277C＞T | 13 | 1 |
| p.K429M | c.1286A>T | 13 | 1 |
| p.G433S | c.1297G>A | 13 | 1 |
| p.G433D | c.1298G>A | 13 | 2 |
| p.P436S | c.1306C>T | 13 | 1 |
| p.V437L | c.1309G>T | 13 | 1 |
| p.V437A | c.1310T>C | 13 | 1 |
| p.P441= | c.1323G>A | 13 | 26 |
| p.M444T | c.1331T>C | 13 | 1 |
| p.T449M | c.1346C>T | 13 | 1 |
| p.V464= | c.1392C>T | 14 | 4 |
| p.T483A | c.1447A>G | 14 | 1 |
| p.I485V | c.1453A>G | 14 | 1 |
| p.E491K | c.1471G＞A | 14 | 1 |
